# Supplementary material
Source: publisher figshare collection journal article supplement (https://gsapubs.figshare.com/ndownloader/files/34171773)
Supplement: Supplementary file 1 [file 34171773]

## Sheet: Table S3
Supplementary Table S3. U–Pb isotope compositions of zircon from the leucogranites and phengite gneisses.
Spot No.	Element (ppm)			Isotopic ratio							206Pb/238U Age	±2σ	Concordance
	Th	U	Th/U	238U/206Pb	±2σ	207Pb/206Pb	±2σ	rho	208Pb/232Th	±2σ
Leucogranite YK173-10a: Zircon core
1	617	360.5	0.584279	9.14077	0.204618	0.06539	0.00137056	0.377708	0.03373	0.000755437	666.291	14.5598	0.961355
2	697	177.5	0.254663	12.4688	0.50169	0.06246	0.00139907	0.237861	0.03554	0.000936663	493.998	19.462	0.937635
3	363.4	166.4	0.457898	10.2564	0.240857	0.06457	0.00140759	0.553861	0.03765	0.000867127	596.217	13.693	0.948501
4	2511	102.4	0.0407806	22.2124	0.51301	0.05592	0.00116894	0.476578	0.01959	0.00069167	282.461	6.44848	0.940186
5	104.5	95	0.909091	7.81861	0.181274	0.06551	0.00155098	0.459555	0.03912	0.000945013	775.422	17.5162	0.998239
6	50.6	50.3	0.994071	8.02568	0.231972	0.0636	0.00228648	0.396312	0.0421	0.00146593	757.812	21.3794	1.00161
7	434.4	263.5	0.606584	9.67118	0.25039	0.06719	0.00152453	0.54082	0.03417	0.000858741	629.256	15.9177	0.934692
8	1267	700.8	0.553118	11.534	0.273181	0.0645	0.00141852	0.305642	0.02967	0.000836794	531.724	12.3426	0.927255
9	437	391.8	0.896568	8.82612	0.192947	0.06482	0.00140055	0.456183	0.03606	0.000855412	689.881	14.7171	0.978126
10	593	13.2	0.0222597	23.1267	0.559925	0.05311	0.00131783	0.484692	0.0266	0.00572477	272.406	6.52361	0.97306
11	55.5	76.2	1.37297	7.93651	0.195064	0.065	0.00183848	0.354949	0.0396	0.00109766	764.729	18.3334	1.0014
12	571	324.9	0.569002	7.93651	0.178607	0.06495	0.00134276	0.404518	0.03937	0.000922171	764.777	16.7592	0.998904
13	101	74.3	0.735644	8.04505	0.315886	0.06421	0.00155115	0.408091	0.04094	0.00105168	755.46	28.8412	1.01035
14	1001	317.5	0.317183	8.92061	0.206235	0.06448	0.00135321	0.378734	0.03559	0.000893454	683.067	15.4039	0.977415
15	935	819	0.875936	10.3093	0.26063	0.06443	0.00143	0.297383	0.03324	0.000765741	593.34	14.6661	0.943043
16	454.8	475	1.04442	7.81861	0.17826	0.06551	0.00145816	0.445272	0.0407	0.00118414	775.422	17.2194	0.997633
17	270	277	1.02593	8.7184	0.241594	0.06476	0.00144469	0.364684	0.03834	0.000949517	698.222	18.8547	0.975691
18	2040	108	0.0529412	21.4592	1.62345	0.05498	0.00141464	0.144477	0.0316	0.00228898	292.582	21.8282	0.947225
19	849	359.3	0.423204	8.14996	0.181444	0.06559	0.00136855	0.342609	0.03868	0.000921117	744.719	16.1545	0.984055
20	2240	213.3	0.0952232	22.8154	0.617766	0.0549	0.00116521	0.324726	0.0229	0.000588782	275.45	7.36989	0.95097
21	2876	113.5	0.0394645	23.2072	0.50946	0.05517	0.00114887	0.262947	0.02143	0.000658557	270.768	5.87935	0.948457
22	185.1	208.1	1.12426	7.80031	0.190612	0.06467	0.00147067	0.376538	0.03944	0.0010285	778.01	18.509	1.00781
23	324	309.1	0.954012	8.39631	0.214804	0.06511	0.00142553	0.353747	0.03871	0.000910926	723.922	18.0429	0.981265
24	1730	90.5	0.0523121	22.9358	0.738418	0.05511	0.00118311	0.369165	0.03651	0.000964413	273.951	8.71228	0.943612
25	540	292.7	0.542037	8.19672	0.18575	0.06694	0.00153948	0.462861	0.03895	0.000920294	739.331	16.3388	0.965342
26	100.7	139.5	1.3853	8.05802	0.188305	0.0653	0.00170752	0.440941	0.03981	0.000979201	753.245	17.17	0.983463
27	403	270.5	0.671216	8.02568	0.198007	0.06486	0.00136979	0.4325	0.03849	0.000923413	756.611	18.1726	0.990906
28	1501	568	0.378414	11.1982	0.385282	0.0638	0.00132313	0.322448	0.03088	0.000847248	547.777	18.4254	0.935412
29	492	72.9	0.148171	15.674	1.17277	0.05729	0.00147572	0.294608	0.03368	0.00104582	397.38	29.1958	0.954324
30	217.9	172.3	0.79073	8.31255	0.188967	0.06446	0.00155529	0.31423	0.03886	0.000975777	731.606	16.2212	0.988645
31	80	68.1	0.85125	7.81861	0.202317	0.0642	0.00175746	0.448463	0.03969	0.00118512	776.703	19.5834	1.00436
32	2509	66.4	0.0264647	24.3902	0.559317	0.05317	0.00113266	0.383387	0.01899	0.000676645	258.453	5.86365	0.958583
33	2214	82.6	0.037308	21.8102	0.548772	0.05567	0.00118307	0.36789	0.02408	0.000694218	287.687	7.15124	0.937298
34	301.1	182.8	0.607107	8.40336	0.206538	0.06565	0.00148794	0.461333	0.03952	0.000980373	722.838	17.317	0.97468
35	79.8	62	0.776942	8.63558	0.223394	0.0645	0.00176185	0.279812	0.03912	0.00106327	704.961	17.7971	0.973718
36	920	116.8	0.126957	17.3611	1.28363	0.05888	0.00141249	0.370683	0.02934	0.0010494	358.689	26.0812	0.951593
37	38.9	91	2.33933	8.06452	0.233683	0.0666	0.00232039	0.351941	0.03902	0.00108932	751.422	21.2594	0.975452
38	234.5	202.8	0.864819	8.23723	0.183767	0.0648	0.0015024	0.409818	0.03815	0.000912233	737.788	16.0496	0.991951
39	206.3	126.1	0.611246	9.93049	0.247642	0.06365	0.00160045	0.29918	0.03475	0.000911661	615.996	15.0198	0.95452
Leucogranite YK173-10a: Zircon mantle
40	3025	31.74	0.0104926	28.6287	0.613849	0.05108	0.00106196	0.361808	0.01144	0.00051376	221.188	4.69996	0.991442
41	2187	25.5	0.0116598	28.1849	0.605995	0.05192	0.00109903	0.366584	0.0218	0.00185205	224.394	4.78118	0.98281
42	3250	38.8	0.0119385	28.5388	0.630892	0.05125	0.00107992	0.368449	0.01277	0.000820749	221.829	4.85932	0.994511
43	3852	45.1	0.0117082	28.8767	0.608546	0.05202	0.00112962	0.30868	0.0219	0.00175552	219.049	4.57677	0.972784
44	2940	44.2	0.015034	27.8319	0.640867	0.05165	0.00110068	0.332723	0.0164	0.00114786	227.285	5.18431	0.98288
45	3000	69.1	0.0230333	28.2646	0.641648	0.05166	0.00109087	0.272277	0.01505	0.000864119	223.842	5.03464	0.983575
46	2463	22.4	0.0090946	28.6779	0.624375	0.05065	0.00106854	0.387294	0.01153	0.000765556	220.932	4.76668	0.99632
47	2550	23.7	0.00929412	28.2725	0.645692	0.05066	0.0010893	0.449471	0.01321	0.000880569	224.062	5.06966	1.00262
48	2106	31.4	0.0149098	27.533	0.775329	0.0525	0.00125642	0.249606	0.03	0.0049366	229.478	6.39919	0.969069
49	2570	29.6	0.0115175	28.9184	0.644482	0.05206	0.00114652	0.402151	0.0202	0.00223679	218.725	4.83206	0.97386
50	2280	78.5	0.0344298	28.2486	0.619999	0.05189	0.001089	0.424112	0.02021	0.000619901	223.902	4.86945	0.976825
51	2637	27.1	0.0102768	28.5225	0.633974	0.05088	0.00108278	0.412536	0.01223	0.000657213	222.058	4.89075	0.995433
52	2709	28.2	0.0104097	28.0348	0.635277	0.05294	0.00111833	0.585295	0.0334	0.00210861	225.292	5.05841	0.965122
53	1990	21.5	0.010804	28.5878	0.643013	0.05139	0.00108576	0.39711	0.0173	0.00134526	221.415	4.93483	0.989587
54	2365	23.2	0.00980973	28.0112	0.646019	0.05138	0.00109218	0.252143	0.0178	0.00144455	225.924	5.16155	0.983918
55	2430	39.4	0.016214	27.9174	0.713517	0.05168	0.00110124	0.385613	0.0229	0.00283721	226.589	5.7349	0.981638
56	2830	31.8	0.0112367	27.8862	0.62757	0.05096	0.00105184	0.365868	0.01367	0.000650267	227.045	5.0611	0.995624
57	3070	30.9	0.0100651	28.49	0.647925	0.05064	0.0010432	0.346623	0.01145	0.000660939	222.376	5.01007	0.997278
58	3542	38.2	0.0107849	28.3527	0.668325	0.0507	0.00104202	0.337347	0.01137	0.000477609	223.424	5.21644	1.00718
59	2365	20.5	0.00866808	28.7935	0.624046	0.05051	0.00107243	0.379546	0.01308	0.000728584	220.093	4.72737	0.996423
60	2940	26.9	0.00914966	28.6123	0.676179	0.05082	0.00105696	0.388036	0.01414	0.000848514	221.386	5.18283	0.992725
61	3057	45	0.0147203	28.6697	0.652946	0.0528	0.0011328	0.376723	0.0206	0.00136372	220.396	4.97474	0.96001
62	2650	42	0.0158491	28.0426	0.654904	0.05202	0.0011111	0.36423	0.0217	0.00137053	225.491	5.21693	0.968862
63	2351	24.5	0.0104211	28.2247	0.656201	0.05076	0.00107714	0.372305	0.01153	0.000642788	224.409	5.16831	0.989878
64	3240	40.9	0.0126235	28.6697	0.656918	0.05256	0.00112833	0.401213	0.0221	0.00195073	220.463	5.00626	0.956648
65	2498	25.5	0.0102082	28.6779	0.653177	0.05086	0.00109672	0.373183	0.01187	0.000691996	220.873	4.9849	0.988686
66	2377	25.9	0.0108961	28.8934	0.663276	0.05099	0.00107186	0.382484	0.01196	0.00101849	219.209	4.9862	0.988652
67	1963	18.11	0.00922567	28.4495	0.606658	0.05218	0.00109759	0.399318	0.0238	0.00186187	222.257	4.69737	0.967315
68	1835	27	0.0147139	27.9018	0.680385	0.0513	0.00108087	0.335525	0.0179	0.00173729	226.823	5.47769	0.985973
69	2738	28.8	0.0105186	28.3768	0.652568	0.05066	0.00107195	0.347352	0.01195	0.000749147	223.247	5.08604	0.993207
70	2340	28.8	0.0123077	28.7026	0.67027	0.05086	0.00107252	0.441848	0.01171	0.000579439	220.685	5.10579	0.991465
71	2814	31.5	0.011194	28.8184	0.751151	0.05109	0.00107688	0.394468	0.0137	0.00123088	219.745	5.67302	0.979308
72	1740	41.1	0.0236207	27.933	0.643768	0.05258	0.00113612	0.429069	0.0131	0.00103375	226.207	5.16529	0.972263
73	2357	21.9	0.00929147	28.5551	0.68777	0.05277	0.00115943	0.373222	0.0308	0.00267198	221.279	5.28126	0.962107
74	2464	35.9	0.0145698	27.7855	0.635751	0.05236	0.00111746	0.411259	0.0292	0.00124541	227.457	5.15586	0.968627
75	3140	44.8	0.0142675	28.3366	0.663627	0.05296	0.00115477	0.40922	0.0209	0.0016537	222.913	5.1732	0.956004
76	2558	40.8	0.01595	28.177	0.675884	0.05201	0.00113737	0.446814	0.0186	0.00154544	224.431	5.33338	0.968347
77	2111	19.28	0.00913311	28.8351	0.796069	0.0508	0.00111528	0.433793	0.01206	0.00088356	219.7	6.0072	0.993543
78	2980	28.6	0.00959732	28.3527	0.668325	0.05119	0.00111044	0.413968	0.01205	0.000768753	223.286	5.21439	0.985837
79	2496	24.6	0.00985577	28.885	0.658984	0.05126	0.00108657	0.334232	0.01242	0.000809075	219.197	4.95546	0.982791
80	2646	28	0.010582	28.4333	0.679472	0.05055	0.00106349	0.369161	0.01351	0.000930112	222.84	5.27483	1.00033
81	2319	24	0.0103493	28.9352	0.724184	0.05131	0.00105166	0.433783	0.01531	0.000979111	218.807	5.42455	0.993465
82	2450	34.2	0.0139592	26.8384	0.61972	0.05262	0.00111555	0.369658	0.0221	0.00137309	235.313	5.38076	0.968516
83	2238	21.99	0.00982574	29.3513	0.616865	0.05026	0.00109331	0.414009	0.01178	0.000786134	216.024	4.50117	1.00348
84	2338	44.5	0.0190334	26.2812	0.587511	0.05343	0.00111839	0.405554	0.0212	0.0012727	239.997	5.31269	0.969629
85	2667	24.3	0.00911136	29.0613	0.615556	0.05064	0.00107157	0.360611	0.01094	0.000752511	218.052	4.57807	0.995502
86	3052	31.2	0.0102228	29.0023	0.626037	0.05082	0.00108165	0.479199	0.01256	0.000696851	218.441	4.67356	0.995635
87	2162	20.5	0.00948196	29.1036	0.653219	0.05057	0.00108399	0.394998	0.0162	0.0017306	217.757	4.84375	0.998558
88	2852	83.7	0.0293478	27.1961	0.66192	0.05254	0.00109844	0.380354	0.0253	0.000815865	232.277	5.59783	0.96424
89	2072	27.5	0.0132722	26.1233	0.592669	0.05142	0.00109293	0.624566	0.0169	0.00212703	242.044	5.43613	0.983898
90	2857	52	0.0182009	26.5745	0.601896	0.0528	0.00111568	0.418845	0.0183	0.000772241	237.568	5.32836	0.962823
91	3918	201	0.0513017	25.3421	0.606973	0.0538	0.0012039	0.484885	0.0203	0.000978231	248.666	5.89547	0.958779
92	3118	28.3	0.00907633	29.0529	0.672027	0.05076	0.00108753	0.350765	0.01146	0.000670397	218.081	4.99879	0.990977
93	2661	39.6	0.0148816	29.2312	0.724095	0.0511	0.00114218	0.43285	0.01379	0.000950876	216.672	5.31863	0.982115
94	2698	31.1	0.0115271	29.1036	0.657106	0.051	0.00106042	0.373215	0.01255	0.000847998	217.639	4.86948	0.98708
95	2583	33.8	0.0130856	29.5072	0.738544	0.05156	0.00110606	0.401462	0.0188	0.00174108	214.543	5.32101	0.977058
96	1950	80.3	0.0411795	26.889	0.758594	0.05434	0.00116157	0.460943	0.02446	0.000797632	234.366	6.54484	0.945687
97	1868	20.9	0.0111884	29.5683	0.650515	0.05057	0.00112824	0.385244	0.0127	0.00122659	214.372	4.67593	0.992828
98	1564	10.31	0.00659207	30.0662	0.716019	0.0506	0.00111582	0.394059	0.0113	0.0012211	210.851	4.9775	0.992142
99	2910	32.8	0.0112715	29.1375	0.726	0.05123	0.00107341	0.37647	0.01441	0.000869172	217.326	5.36459	0.98522
100	2987	31.95	0.0106964	29.5596	0.686777	0.05177	0.00110293	0.405149	0.02109	0.000984894	214.11	4.93066	0.970308
101	2073	28.4	0.0137	27.4574	0.670373	0.0524	0.0011114	0.313515	0.01594	0.000964227	230.132	5.56419	0.969065
102	2209	20.8	0.00941603	29.0529	0.655715	0.05074	0.00107346	0.437271	0.01212	0.000647115	218.087	4.87777	0.986948
103	2240	28.8	0.0128571	29.2398	0.783567	0.05139	0.0011103	0.452098	0.0214	0.00185018	216.53	5.74817	0.982924
104	2461	38.6	0.0156847	27.4048	0.621448	0.0519	0.00107254	0.331553	0.01503	0.000609311	230.715	5.18161	0.978832
105	2918	31.6	0.0108293	29.1121	0.642306	0.05115	0.00107491	0.406855	0.0143	0.00133109	217.536	4.75683	0.987895
106*	3017	103	0.0341399	27.5406	0.608193	0.05575	0.00127095	0.347217	0.0228	0.00283689	228.474	5.0029	0.924294
107*	2827	48.9	0.0172975	27.8629	0.60397	0.05656	0.00123277	0.435666	0.0406	0.00243913	225.629	4.85026	0.909433
108*	3530	93.5	0.0264873	25.5689	0.648497	0.05481	0.00113919	0.277972	0.026	0.00094578	246.172	6.17867	0.943321
109*	2807	73.5	0.0261845	27.571	0.599662	0.05538	0.00124566	0.405732	0.0295	0.00179947	228.333	4.92402	0.924771
110*	1959	47.5	0.0242471	26.434	0.66615	0.0565	0.00157699	0.655492	0.0421	0.00516904	237.7	5.93997	0.916305
111*	2249	27.2	0.0120943	27.5482	0.618391	0.05516	0.0012754	0.153033	0.0484	0.00431011	228.583	5.08719	0.931792
112*	2822	56	0.0198441	26.5534	0.62598	0.0545	0.00227774	0.338636	0.0237	0.00333387	237.245	5.57001	0.938881
Spot No.	Element (ppm)			Isotopic ratio							206Pb/238U Age	±2σ	Concordance
	Th	U	Th/U	238U/206Pb	±2σ	207Pb/206Pb	±2σ	rho	208Pb/232Th	±2σ
Phengite gneiss YK173-10b: Zircon core
1	72.9	90.6	1.2428	8.53534	0.182865	0.06409	0.00161351	0.436517	0.03864	0.000889281	713.376	14.9251	0.993419
2	62.1	45.6	0.7343	8.09061	0.182824	0.0658	0.00178097	0.326614	0.04038	0.00124688	749.825	16.5411	0.990869
3	130	151.1	1.16231	7.94281	0.175974	0.06508	0.00157679	0.333106	0.03961	0.00103754	764.063	16.5046	1.00128
4	124.4	115.1	0.925241	10.8933	0.260272	0.06368	0.00161312	0.351618	0.03124	0.000832391	562.826	13.1753	0.945068
5	91	69	0.758242	8.35422	0.193557	0.0651	0.00164171	0.472707	0.04016	0.00127485	727.474	16.4454	0.980745
6	37.61	44.2	1.17522	7.5643	0.183017	0.063	0.00203657	0.300357	0.0409	0.00145228	803.24	18.9669	1.03231
7	119.5	128.3	1.07364	9.13242	0.204394	0.06462	0.00155238	0.337805	0.03797	0.000926061	667.532	14.5961	0.975879
8	56	48.7	0.869643	8.74891	0.248215	0.0669	0.00266087	0.398659	0.0388	0.00151399	693.976	19.2879	0.954589
9	60.1	68.4	1.1381	7.83085	0.184812	0.0656	0.00177802	0.305704	0.04017	0.00101482	774.157	17.8194	0.995559
10	145.3	185.7	1.27805	7.88022	0.183072	0.06492	0.00147985	0.423273	0.03912	0.00107692	770.109	17.4269	0.992693
11	42.9	36.86	0.859207	7.75795	0.207934	0.0658	0.00256356	0.331107	0.0421	0.00130727	781.021	20.4731	0.990042
12	122.1	112	0.917281	8.726	0.212837	0.0651	0.00164171	0.412236	0.04055	0.00105836	697.331	16.6006	0.982451
13	106.2	97.3	0.916196	10.1112	0.236529	0.0662	0.00256768	0.181705	0.03904	0.00126085	603.315	13.8987	0.935145
14	72.7	90.7	1.24759	7.83085	0.178604	0.0654	0.00153849	0.355946	0.04102	0.00113201	774.353	17.2088	0.997374
15	51.6	51.6	1	9.7561	0.259664	0.0645	0.00190371	0.394169	0.03651	0.00101153	626.048	16.3014	0.961258
16	133.4	62.2	0.466267	13.7552	0.369027	0.0624	0.0018755	0.231426	0.03612	0.00089597	448.764	11.8455	0.914222
17	89.5	79.8	0.89162	8.48896	0.201269	0.0649	0.00170141	0.510271	0.03897	0.00115324	716.432	16.5796	0.982915
18	69.1	100	1.44718	8.05802	0.179008	0.065	0.00170294	0.345227	0.03871	0.00105047	753.53	16.3355	0.990883
19	242.7	298.4	1.2295	9.25926	0.220681	0.0667	0.00224044	0.228454	0.03874	0.00103088	656.903	15.3536	0.937321
20	84.6	40.3	0.476359	10.9409	0.333275	0.066	0.00185267	0.434745	0.0368	0.00140773	558.789	16.6682	0.919672
21	209.3	158.4	0.756808	9.1659	0.201653	0.06496	0.00153102	0.268513	0.03624	0.000940922	664.874	14.2923	0.970304
22	42.81	53.7	1.25438	8.1367	0.201703	0.0653	0.00214374	0.293478	0.0403	0.00136368	746.17	18.0775	0.987451
23	104.6	83.2	0.795411	7.95545	0.195687	0.06467	0.00156438	0.42947	0.03948	0.00113118	763.278	18.2902	0.997284
24	94.1	30	0.31881	24.6063	0.615303	0.0527	0.00217277	0.431886	0.01279	0.000579512	256.364	6.36906	0.966794
25	79	210.5	2.66456	8.38926	0.219009	0.067	0.002925	0.263565	0.03906	0.00100358	722.785	18.53	0.961173
26	102.4	65.8	0.642578	8.57633	0.196378	0.06417	0.00161478	0.307559	0.039	0.00111018	709.99	15.8677	0.990994
27	78.1	70.9	0.90781	8.01925	0.175292	0.06344	0.00146883	0.383472	0.03876	0.00111397	758.555	16.1608	1.0011
28	139.4	197	1.4132	8.77963	0.228653	0.06469	0.0015056	0.491214	0.03789	0.000948241	693.547	17.6129	0.978841
29	87.5	54.2	0.619429	9.06618	0.228918	0.06263	0.00155416	0.408628	0.03946	0.00100982	673.965	16.6074	0.990118
30	209	181	0.866029	11.6645	0.260991	0.06309	0.00153836	0.444464	0.03351	0.00085444	526.851	11.5649	0.940845
31	108.5	109.5	1.00922	8.19672	0.196037	0.06517	0.00152933	0.47495	0.03905	0.00100973	740.984	17.2728	0.982499
32	84.5	82.8	0.979882	8.62069	0.205312	0.0669	0.00193655	0.373547	0.04009	0.00109109	704.008	16.3919	0.964776
33	82.8	21.6	0.26087	14.7929	0.441901	0.059	0.0016132	0.191297	0.037	0.00241611	419.684	12.3262	0.932555
34	129.3	180.7	1.39753	8.14332	0.19084	0.0669	0.00179729	0.401609	0.03922	0.000941108	744.077	17.0213	0.970118
35	48	52	1.08333	7.71605	0.206316	0.0665	0.00274388	0.436146	0.0439	0.00133075	784.444	20.5364	0.988114
36	84.2	175.7	2.0867	8.1367	0.194174	0.0668	0.00173058	0.411406	0.03813	0.000964188	744.759	17.3392	0.977529
37	89.1	101.2	1.1358	7.93651	0.184722	0.06607	0.00158209	0.4268	0.04002	0.00103109	763.698	17.3246	0.981278
38	36.72	57.2	1.55773	7.91766	0.194445	0.0664	0.00215722	0.369422	0.04027	0.0012531	765.145	18.3616	0.97294
39	78.9	147.4	1.86819	8.33333	0.200308	0.0659	0.00178245	0.214233	0.03886	0.00102613	728.51	17.0928	0.972251
40	69.1	180.5	2.61216	7.8064	0.198067	0.0655	0.00171058	0.320332	0.04017	0.000996771	776.609	19.1988	0.98078
41	56.6	165	2.91519	8.15661	0.228271	0.0644	0.00221336	0.195432	0.03774	0.00100266	745.246	20.3627	0.994711
42	160.2	81.4	0.508115	7.7821	0.174421	0.06496	0.00154169	0.487981	0.03883	0.00123479	779.493	17.0242	0.993625
43	77.6	62.9	0.810567	13.4589	0.334904	0.0595	0.0022419	0.358214	0.02474	0.00082488	460.12	11.2882	0.935999
44	55.9	48.3	0.864043	8.16994	0.191634	0.0643	0.00175892	0.362838	0.038	0.00150586	744.159	17.0331	0.985542
45	98.9	73.6	0.744186	8.16994	0.195204	0.0647	0.00190642	0.488651	0.03788	0.00122293	743.784	17.3527	0.987436
46	64.42	134.7	2.09097	8.04505	0.19865	0.0637	0.00161959	0.273234	0.03888	0.000988313	755.945	18.1903	1.00513
47	140.7	109	0.774698	18.7336	0.435044	0.0562	0.0015727	0.460434	0.02123	0.000563192	333.954	7.66143	0.954813
Phengite gneiss YK173-10b: Zircon mantle
48	269.9	1.93	0.0071508	27.7239	0.626699	0.0518	0.00151106	0.526446	0.0059	0.00650107	228.118	5.11695	0.975755
49	66.4	20.1	0.302711	27.7239	0.641604	0.0522	0.00261724	0.360974	0.01183	0.000843848	228.003	5.27121	0.986988
50	110.3	16.9	0.153218	27.2183	0.638337	0.0525	0.00183098	0.31273	0.0137	0.00152482	232.101	5.40769	0.963148
51	92.1	10.6	0.115092	28.1452	0.784613	0.0528	0.00200128	0.232196	0.013	0.00132575	224.457	6.21376	0.964056
52	82.3	12.7	0.154313	28.0034	0.641925	0.0523	0.00289553	0.174791	0.0123	0.0016188	225.724	5.18264	0.960565
53	225	3.48	0.0154667	27.5027	0.595024	0.05141	0.00142042	0.277218	0.0237	0.006617	230.044	4.93763	0.993395
54	61.2	12	0.196078	27.4801	0.654242	0.0521	0.00225516	0.308797	0.0126	0.00152102	230.032	5.45374	0.981892
55	167.2	8.4	0.0502392	28.0348	0.614519	0.05212	0.00134503	0.394736	0.0124	0.001817	225.525	4.90331	0.969801
56	112.5	0.67	0.00595556	27.7624	0.680303	0.0517	0.00252174	0.16486	-0.008	-0.0120011	227.834	5.5674	0.992583
57	246	16.16	0.0656911	27.465	0.626715	0.05215	0.00137111	0.463764	0.01273	0.000983525	230.142	5.20708	0.978392
58	229	3.64	0.0158952	27.9642	0.700798	0.0511	0.00157622	0.423415	0.0107	0.00910252	226.379	5.62759	0.982429
59	77.19	19.3	0.250032	27.1444	0.660255	0.0511	0.00198355	0.348898	0.0126	0.000963537	233.137	5.63568	0.992794
60	239.6	4.9	0.0204508	27.7932	0.618127	0.0524	0.00151931	0.405755	0.0225	0.00482105	227.383	5.0192	0.960806
61	103.1	15.76	0.152861	27.8707	0.702305	0.0534	0.00235598	0.319707	0.0115	0.00112379	226.472	5.68318	0.955269
62	154.8	9.2	0.0594315	27.4801	0.707509	0.0534	0.00160643	0.297665	0.0128	0.00142321	229.654	5.86435	0.950984
63	39.2	17.2	0.438776	27.8241	0.719938	0.052	0.00393975	0.169141	0.01168	0.000823814	227.248	5.92257	0.966643
64	39.68	13	0.327621	27.2183	0.688949	0.0514	0.00442117	0.171745	0.0123	0.00142145	232.424	5.95806	0.984412
65	80.1	21.1	0.263421	28.177	0.732802	0.0479	0.00286492	0.28511	0.01178	0.000969076	225.595	5.85819	1.03707
66	80.6	13.8	0.171216	27.8164	0.677624	0.0539	0.00300035	0.208328	0.0112	0.00141781	226.765	5.5298	0.950685
67	216	4.46	0.0206481	26.7881	0.625555	0.05156	0.00141572	0.500628	0.0175	0.00391567	236.065	5.46465	0.979309
68	51.5	20	0.38835	28.49	0.771057	0.0517	0.00422838	0.167653	0.01188	0.000863339	222.079	6.0611	1.00315
69	79.9	25.7	0.321652	26.2881	0.625373	0.054	0.00272331	0.178535	0.01241	0.000695775	239.762	5.69679	0.95413
70	237.6	5.31	0.0223485	28.6287	0.647922	0.051	0.00165239	0.253179	0.0129	0.00331007	221.21	4.97287	0.99253
71	158.3	9.9	0.0625395	26.5675	0.670765	0.0529	0.00167612	0.317297	0.018	0.00222926	237.6	5.94996	0.974061
72	66.2	15.5	0.234139	26.7738	0.728957	0.051	0.00251603	0.250944	0.01209	0.000893346	236.357	6.4041	1.00046
73	121.9	2.23	0.0182937	26.2743	0.632527	0.051	0.00198252	0.400119	0.0136	0.00780474	240.797	5.75964	1.00816
74*	59.9	11.69	0.195159	26.5816	0.642254	0.0549	0.00319462	0.231249	0.0131	0.00122827	236.876	5.73747	0.937902
75*	67.5	16.1	0.238519	27.5103	0.647081	0.0554	0.00338639	0.212039	0.0138	0.0011341	228.825	5.41187	0.927072
76*	47.91	14.13	0.294928	27.9018	0.667298	0.0545	0.004436	0.109341	0.01176	0.00081469	225.908	5.49134	0.93841
77*	108.6	0.93	0.00856354	27.6778	0.656203	0.0566	0.00212636	0.331874	-0.03	-0.110002	227.11	5.36018	0.916281
78*	41.2	12.33	0.299272	27.571	0.782302	0.0564	0.00425234	0.200774	0.0126	0.00122617	228.038	6.51543	0.916274
79*	51.5	10.87	0.211068	28.0899	0.734676	0.0549	0.00414796	0.121073	0.0118	0.00112503	224.298	5.92017	0.923085
80*	138.6	17.8	0.128427	27.7392	0.684021	0.0544	0.00210327	0.324382	0.01321	0.000976423	227.245	5.57393	0.940702
81*	63.4	13.4	0.211356	27.7008	0.691831	0.0548	0.00376314	0.273074	0.0116	0.00102656	227.442	5.72053	0.938892
Phengite gneiss YK173-10b: Zircon rim
82	165.1	12.9	0.0781345	28.6779	0.657151	0.0509	0.00165116	0.361171	0.0126	0.00103126	220.862	5.02663	0.989407
83	324	8.6	0.0265432	28.6779	0.63453	0.05172	0.00129552	0.460198	0.0145	0.00271553	220.634	4.84181	0.982955
84	101.5	0.64	0.00630542	28.7026	0.666054	0.0511	0.0024258	0.124688	0.0008	0.00510003	220.619	5.10825	0.992192
85	153	0.7	0.00457516	27.8241	0.6914	0.0523	0.00182869	0.303532	0.0022	0.00800012	227.162	5.6059	0.979389
86	160.4	13.9	0.0866584	27.7624	0.662967	0.0533	0.00168118	0.477197	0.0127	0.00142285	227.374	5.39051	0.945543
87	124.8	0.81	0.00649038	28.777	0.733957	0.053	0.00175602	0.266031	-0.003	-0.062	219.528	5.5596	0.948828
88	165.5	0.5	0.00302115	29.0782	0.668551	0.0506	0.00189318	0.459854	0.0031	0.00820023	217.937	4.98365	0.987196
89	106.3	16.7	0.157103	27.4123	0.691121	0.0531	0.00235326	0.445682	0.0121	0.00112631	230.303	5.78115	0.964453
90	103.9	1.8	0.0173244	29.36	0.689839	0.0502	0.00197434	0.315116	0.0044	0.00470082	215.977	5.04876	1.02155
91	97.3	16	0.16444	25.3871	0.714511	0.054	0.0021855	0.365129	0.0181	0.00173812	248.167	6.93362	0.948811
92*	191.8	7.5	0.0391032	29.5508	0.68212	0.0544	0.00185304	0.456924	0.0197	0.00401936	213.462	4.90115	0.9368
93*	66.09	0.4	0.00605235	28.6123	0.685042	0.0531	0.00327686	0.113026	0.0011	0.00530005	220.75	5.30689	0.940468
Spot No.	Element (ppm)			Isotopic ratio							206Pb/238U Age	±2σ	Concordance
	Th	U	Th/U	238U/206Pb	±2σ	207Pb/206Pb	±2σ	rho	208Pb/232Th	±2σ
Leucogranite YK1711-1a: Zircon core
1	99.9	97.2	0.972973	7.7821	0.217134	0.0635	0.0028936	0.138048	0.0364	0.00194164	765.399	29.8192	1.01948
2	172	157	0.912791	7.94913	0.228619	0.0633	0.0018146	0.400837	0.0359	0.0013984	752.363	22.5929	1.01526
3	630	134	0.212698	12.0482	2.04646	0.0586	0.0023181	0.311351	0.0358	0.00139737	521.09	71.2603	0.964723
4	112.4	146	1.29893	7.63359	0.293416	0.064	0.002898	0.560123	0.0413	0.00216386	780.066	33.2365	1.01791
5	178	144	0.808989	7.63359	0.259452	0.0633	0.00204028	0.440236	0.0383	0.00195621	774.094	27.7099	1.02663
6	80.2	61.8	0.770574	8.61326	0.275614	0.0672	0.00257805	0.209248	0.0393	0.00233619	741.547	32.7862	0.954694
7	125.9	132.1	1.04925	8.26446	0.404171	0.0651	0.0023033	0.363931	0.0364	0.00241246	746.605	32.4703	0.985639
8	62.7	51.9	0.827751	7.68049	0.311815	0.0626	0.00334328	0.19824	0.0349	0.00249944	764.791	38.6558	1.03153
9	95	86	0.905263	8.05802	0.362458	0.0665	0.00274388	0.428213	0.0392	0.00310075	771.501	34.4521	0.978601
10	383	292	0.762402	8.54701	0.364054	0.065	0.00198494	0.44105	0.0356	0.00139533	728.177	28.636	0.978585
11	77.1	68.9	0.893645	7.88643	0.244322	0.065	0.00272947	0.325007	0.0393	0.00205616	770.803	28.1931	0.998669
12	222	235	1.05856	9.15751	0.318004	0.0636	0.00189156	0.419721	0.032	0.001449	682.049	24.2804	0.979991
13	219	188	0.858447	8.19672	0.275739	0.065	0.00206155	0.376959	0.0374	0.00167616	750.149	24.9676	0.990113
14	297	362	1.21886	8.95255	0.24574	0.0654	0.00177507	0.420999	0.03565	0.00102043	707.478	24.7253	0.965019
15	509	496	0.97446	8.1103	0.255441	0.06494	0.00150482	0.395839	0.03634	0.00103723	755.292	21.0995	0.992383
16	212	172.3	0.812736	7.27273	0.203842	0.0642	0.00189965	0.235883	0.0441	0.00165467	808.464	25.8158	1.02677
17	243	219	0.901235	8.51789	0.317943	0.0648	0.00190778	0.330955	0.0344	0.00138324	728.35	25.8451	0.983088
18	165.7	136.2	0.821967	8	0.240235	0.0651	0.00238646	0.260089	0.0377	0.00159013	763.932	25.5823	0.993907
19	214	180.6	0.843925	8.22368	0.261179	0.0662	0.00200074	0.394562	0.0363	0.00157705	758.137	25.7129	0.97634
Leucogranite YK1711-1a: Zircon mantle
20	2400	46.5	0.019375	27.9174	0.713517	0.05023	0.00126575	0.256644	0.01086	0.000887004	225.015	7.43455	1.00854
21	719	27.7	0.0385257	27.5482	0.770643	0.0508	0.00142557	0.368703	0.0127	0.00142285	230.028	8.15736	0.999107
22	1670	34.3	0.0205389	28.3849	0.788956	0.05144	0.00118597	0.404013	0.0126	0.00171858	226.471	7.89972	0.985798
23	2105	19.9	0.00945368	28.8434	0.825637	0.0525	0.00152069	0.432149	0.029	0.0100168	227.36	10.774	0.966234
24	1331	48.2	0.0362134	27.7624	0.829755	0.0523	0.00144711	0.314151	0.029	0.00335058	234.461	10.2398	0.972083
25	1292	47	0.0363777	26.1438	0.817809	0.052	0.00261565	0.213818	0.0145	0.00590712	246.081	13.4445	0.984097
26	2210	38.5	0.0174208	27.027	0.669159	0.05257	0.00117296	0.305142	0.0195	0.00193961	241.245	9.5011	0.971129
27	950	20.9	0.022	25.2525	1.13846	0.0516	0.00150832	0.410259	0.0262	0.00881559	252.036	12.0833	0.992508
28	3100	280	0.0903226	25.641	1.05366	0.05342	0.00126644	0.195467	0.0248	0.00139141	256.398	13.7452	0.96267
29	1560	81.2	0.0520513	24.0964	1.41976	0.0528	0.00141377	0.406767	0.0343	0.00220921	268.057	16.0952	0.975379
30*	85	3.1	0.0364706	30.2389	1.07352	0.0552	0.00453639	0.469101	-0.011	-0.025001	227.952	24.5242	0.925666
Leucogranite YK1711-1a: Zircon rim
31	2429	29.6	0.0121861	28.9603	0.784007	0.05057	0.00128337	0.414329	0.0152	0.00212189	219.046	7.31359	0.998916
32	1365	32	0.0234432	28.1215	0.907136	0.05193	0.00142112	0.24985	0.0209	0.00332637	230.317	9.82862	0.978747
33	1003	0.5	0.000498504	28.5633	0.930324	0.0526	0.00167233	0.570114	0.05	0.0820061	229.747	11.7483	0.965225
34	3100	42.7	0.0137742	27.9877	0.735959	0.05178	0.00124999	0.32524	0.0176	0.00173606	230.704	8.35309	0.981275
35	1040	31.6	0.0303846	28.0978	0.793721	0.0506	0.00142272	0.413267	0.0153	0.00251866	225.196	8.0529	1.00001
36	1172	31.1	0.0265358	30.4785	0.801368	0.05054	0.00141486	0.232016	0.0116	0.00171576	209.071	7.3096	0.995152
37	3247	97	0.0298737	27.9642	0.761036	0.05256	0.00119106	0.18231	0.0139	0.00132939	233.983	9.97647	0.968181
Spot No.	Element (ppm)			Isotopic ratio							206Pb/238U Age	±2σ	Concordance
	Th	U	Th/U	238U/206Pb	±2σ	207Pb/206Pb	±2σ	rho	208Pb/232Th	±2σ
Phengite gneiss YK1711-1b: Zircon core
1	195.8	162.2	0.828396	10.989	0.383251	0.0651	0.00206281	0.509075	0.03602	0.0012163	606.27	36.3715	0.926767
2	597	496	0.830821	11.0375	0.534977	0.06484	0.00150817	0.276621	0.03319	0.000964692	602.441	37.509	0.928012
3	263	180	0.684411	11.236	1.28231	0.0623	0.00270417	0.406918	0.0377	0.00167884	576.605	56.691	0.938746
4	174	44.9	0.258046	13.8889	1.94891	0.0611	0.00342539	0.253804	0.0324	0.00248594	481.389	62.747	0.914966
5	230	75.3	0.327391	11.9048	1.71727	0.0628	0.0026206	0.114145	0.0339	0.00173772	554.994	68.5226	0.924518
6	335	90	0.268657	18.4162	0.574507	0.0593	0.00199163	0.446751	0.0297	0.00199069	373.049	29.3103	0.913684
7	174	89.9	0.516667	10.929	0.360488	0.0639	0.00237345	0.286185	0.0354	0.00148029	600.3	32.632	0.939465
8	249	60.1	0.241365	18.6916	1.44664	0.0584	0.00206258	0.0498936	0.0337	0.00327021	363.739	34.2253	0.921497
9	232	27	0.116379	22.2222	0.821892	0.0577	0.00248429	0.373603	0.0275	0.00374066	310.725	27.2209	0.911012
10	960	490	0.510417	15.1745	1.41453	0.0611	0.00171268	0.421116	0.023	0.00128515	448.379	44.7937	0.913783
11	975	586	0.601026	13.9082	0.524708	0.06246	0.00156939	0.267746	0.02349	0.000746399	489.347	34.879	0.91491
12	792	426	0.537879	18.2482	0.673543	0.0604	0.00163379	0.302021	0.0238	0.00129096	381.731	33.1865	0.90157
13	287	42.9	0.149477	20.5761	0.72158	0.0581	0.00231306	0.416435	0.0273	0.00246132	333.877	27.48	0.918936
14	335	174	0.519403	10.4603	0.878718	0.0645	0.00221452	0.331351	0.0331	0.00239338	624.757	48.3461	0.938947
15	186	169	0.908602	7.94281	0.308941	0.0643	0.00213162	0.461545	0.0372	0.0022279	761.149	27.4366	1.00317
16	422	267.2	0.633175	8.80282	0.256091	0.0658	0.00171518	0.411565	0.03564	0.000985131	719.246	25.2786	0.965472
17	209	26.9	0.128708	17.6056	1.68009	0.0569	0.00238852	0.148096	0.0435	0.00725237	374.206	35.6529	0.945712
18	425	26.2	0.0616471	25.1256	2.14303	0.053	0.00226354	0.411714	0.0228	0.0058179	259.224	22.8217	0.961369
19	227	228	1.00441	7.77001	0.2341	0.06565	0.00156958	0.434462	0.0385	0.00134272	784.288	21.1273	0.995082
20	96.9	94.8	0.978328	7.89889	0.226434	0.0639	0.0018956	0.402816	0.0362	0.00166559	760.776	22.5261	1.01034
21	362.7	330	0.909843	8.51789	0.521954	0.06515	0.00158931	0.675613	0.0388	0.00142905	731.153	35.5861	0.977771
22	158	118	0.746835	8.31947	0.317095	0.0642	0.00213041	0.400997	0.0395	0.00215037	735.792	26.5614	0.995789
23	191	50.6	0.264921	14.3885	1.78312	0.0573	0.00265957	0.16397	0.0296	0.00237497	444.398	48.3712	0.96067
24	166	118	0.710843	9.24214	0.380973	0.0662	0.0022345	0.410129	0.038	0.00261297	697.501	34.3454	0.949938
25	723	66.3	0.0917012	23.2019	1.02608	0.0523	0.00159189	0.626803	0.0167	0.00183073	274.8	13.1468	0.989321
26	286	343	1.1993	7.88643	0.273883	0.0641	0.001756	0.298392	0.03689	0.0011793	763.297	24.0097	1.0074
27	165	209	1.26667	8.12348	0.355993	0.0656	0.00239193	0.35278	0.0361	0.00157521	759.824	31.2038	0.983965
28	148.3	131.9	0.889413	9.58773	0.285431	0.0643	0.0022943	0.443698	0.0327	0.00136664	664.838	27.6206	0.962506
29	541	114	0.210721	23.8095	1.07495	0.054	0.00209914	0.557953	0.0213	0.00175256	276.281	17.2844	0.95651
30	108.7	148.6	1.36707	7.63942	0.232375	0.0652	0.00255742	0.273752	0.0385	0.00168609	789.804	27.3059	1.00509
31	63.8	57.7	0.904389	7.97448	0.311083	0.0644	0.00308204	0.311386	0.0381	0.00328947	759.85	33.0442	1.00257
32	305	24.8	0.0813115	22.6757	2.35788	0.0522	0.00243515	0.229936	0.019	0.0150048	279.902	27.9193	0.981502
33	409	490	1.19804	7.82473	0.260433	0.06488	0.00161411	0.356012	0.0381	0.00133815	774.052	22.5179	1.00177
34	140.6	112.8	0.802276	7.8125	0.227093	0.0637	0.00196801	0.53596	0.04	0.00161245	764.994	23.7312	1.01574
35	55.8	59.2	1.06093	8.09717	0.336561	0.0674	0.00292867	0.226624	0.0365	0.00377133	776.156	35.7051	0.965234
36	372	427	1.14785	8.00641	0.318777	0.0642	0.00169076	0.265135	0.03695	0.0012354	756.056	25.4975	1.00261
37	859	467	0.543655	10.5485	0.626338	0.063	0.00150881	0.463916	0.033	0.00182362	609.985	33.9576	0.955845
38	430.5	326	0.757259	11.8765	0.919819	0.0611	0.0018583	0.654843	0.0372	0.00149784	544.355	38.5449	0.953557
39	290.9	20.5	0.070471	24.0964	2.31519	0.053	0.00244205	0.608006	0.061	0.0970077	268.949	25.865	0.969759
40	109.5	135.3	1.23562	8.23723	0.277988	0.064	0.002049	0.357941	0.0372	0.00158541	739.365	24.4333	0.999169
41	177.3	138.7	0.78229	7.81861	0.23184	0.0666	0.00232039	0.112718	0.0383	0.00150889	788.74	26.1185	0.983969
42	132	92.5	0.700758	8.45308	0.706491	0.0637	0.00196801	0.0600503	0.0385	0.0014258	723.431	46.131	0.994288
43	105.8	105	0.992439	7.89266	0.264153	0.0651	0.0023033	0.324094	0.0382	0.00177305	771.207	26.3438	0.997312
44	843	121	0.143535	22.5632	0.628751	0.0524	0.00159321	0.562726	0.0173	0.00105817	282.063	10.3831	0.991672
45	348	432	1.24138	7.55858	0.486836	0.0647	0.00163537	0.456254	0.0407	0.00359341	791.419	38.4104	1.01161
Phengite gneiss YK1711-1b: Zircon mantle
46	480	28.3	0.0589583	28.5388	0.854031	0.0515	0.00158142	0.374294	0.0125	0.00370844	225.611	9.25876	0.98446
47	365	19.5	0.0534247	27.4424	0.866292	0.0501	0.00214802	0.309892	0.0132	0.00181926	227.972	11.1505	1.01469
48	330	16.2	0.0490909	26.9905	0.783755	0.0517	0.00190503	0.370031	-0.03	-0.110002	237.971	10.4165	0.985194
49	985	37.4	0.0379695	28.2646	0.895891	0.05176	0.00138493	0.382843	0.0125	0.00181728	228.601	9.39132	0.980783
50	309	18.9	0.061165	26.9542	1.15117	0.0542	0.00236327	0.402527	0.0153	0.00660709	248.475	18.0548	0.945856
51	436	18.7	0.0428899	27.0051	0.795042	0.0525	0.00199812	0.35396	0.0179	0.00591085	241.133	11.9365	0.969008
52	637	30.2	0.0474097	27.8551	0.869269	0.0514	0.00135974	0.352101	0.0129	0.00191744	230.164	8.79021	0.987595
53	369	16.4	0.0444444	26.295	0.682875	0.0508	0.00172981	0.326214	0.018	0.00381701	239.79	9.17549	1.003
54	496	36.9	0.0743952	28.4333	0.867299	0.0519	0.00166356	0.338695	0.0105	0.00102181	227.936	10.134	0.977837
55	550	42.3	0.0769091	28.5144	0.858959	0.0519	0.00190721	0.231371	0.0121	0.00112631	227.356	10.7306	0.977192
56	236	10.4	0.0440678	27.049	0.824268	0.0523	0.002436	0.247678	0.021	0.0130068	239.968	13.0175	0.973914
57	475	42.5	0.0894737	26.9397	0.80278	0.0514	0.00198665	0.406411	0.0114	0.00131984	237.138	10.5031	0.991037
58	436	17.7	0.0405963	26.2054	0.73482	0.052	0.00216601	0.203281	0.0077	0.00880135	245.566	11.5524	0.981825
59	657	26.9	0.0409437	28.1057	0.816679	0.0503	0.00172396	0.398082	0.0121	0.0015194	223.941	9.1225	1.00517
60	395	12.6	0.0318987	25.4453	1.15419	0.0514	0.00181846	0.462715	0	#DIV/0!	249.483	12.7544	0.991363
61	717	35.2	0.0490934	28.6369	0.652027	0.051	0.00150013	0.338473	0.018	0.0140046	222.958	7.60056	0.99334
62	417	16.3	0.0390887	26.062	0.787965	0.0529	0.0015998	0.352917	0.017	0.0140041	250.551	11.738	0.96926
Phengite gneiss YK1711-1b: Zircon rim
63	592	-1.5	-0.00253378	28.49	0.991716	0.0536	0.00272014	0.518	0.004	0.0230001	234.185	16.634	0.947678
64	695	3.7	0.00532374	28.7687	0.941219	0.0507	0.0016487	0.499999	-0.035	-0.0590042	220.866	9.17213	0.997269
65	248.5	16.7	0.0672032	28.0034	0.840978	0.0522	0.00261724	0.194676	0.012	0.00410702	232.26	13.296	0.973907
66	606	18.4	0.030363	28.9436	0.885572	0.0519	0.00158665	0.193333	0.036	0.0340076	224.331	9.95938	0.976207
67	393	5.9	0.0150127	27.3973	1.5278	0.0543	0.00218847	0.470015	0.002	0.045	245.306	19.5657	0.939871
68	103	9.7	0.0941748	24.8139	1.97222	0.0507	0.00393296	0.471904	-0.028	-0.0560028	252.019	24.8983	1.0161
Spot No.	Element (ppm)			Isotopic ratio							206Pb/238U Age	±2σ	Concordance
	Th	U	Th/U	238U/206Pb	±2σ	207Pb/206Pb	±2σ	rho	208Pb/232Th	±2σ
Leucogranite YK192-1a: Zircon core
1	194.8	294.9	1.51386	8.17661	0.264004	0.0659	0.00199678	0.358883	0.03628	0.00116387	758.777	25.2	0.981649
2	276	213.1	0.772101	11.0497	0.906446	0.0625	0.00203039	0.186136	0.0302	0.00199369	585.417	43.164	0.952973
3	483	263.7	0.545963	10.0705	0.348138	0.0642	0.00175746	0.31431	0.02938	0.000952772	640.439	28.4061	0.952943
4	266.7	284.6	1.06712	7.23066	0.209526	0.0649	0.00163854	0.157958	0.04	0.00123434	817.778	23.5919	1.02087
5	350	351	1.00286	8.10373	0.286635	0.06538	0.00147848	0.421522	0.0378	0.00133474	759.329	23.0723	0.988101
6	108	78.4	0.725926	9.94036	0.606606	0.0649	0.00272852	0.485535	0.037	0.00289614	651.84	41.5704	0.948911
7	191.5	108.6	0.567102	8.01282	0.231407	0.0648	0.00198233	0.32482	0.0383	0.00159586	760.597	22.5652	0.996785
8	690	599	0.868116	8.48896	0.205229	0.06612	0.00151537	0.291332	0.03501	0.000935243	740.671	22.0274	0.969202
Leucogranite YK192-1a: Zircon mantle
9	4050	34.5	0.00851852	27.6396	0.82407	0.05148	0.00110457	0.356923	0.0103	0.00550386	232.091	8.0749	0.987187
10	3010	31.9	0.010598	28.2008	0.798089	0.051	0.00117835	0.363792	0.0108	0.00161451	226.048	7.51301	0.993192
11	2720	44.3	0.0162868	28.1611	0.878416	0.05301	0.00134031	0.39545	0.0153	0.00192448	234.299	11.8518	0.960867
12	3120	44.7	0.0143269	27.8087	0.719376	0.05146	0.00113563	0.192781	0.011	0.000916788	230.749	7.51812	0.987135
13	3240	39.1	0.0120679	28.1057	0.745542	0.05177	0.001212	0.329248	0.0128	0.00162035	229.797	8.28613	0.980323
14	3560	62.3	0.0175	28.49	1.05918	0.05201	0.00118613	0.391633	0.0121	0.00132233	227.962	10.2164	0.975229
15	4090	48.8	0.0119315	28.3126	0.774946	0.05136	0.001106	0.362198	0.00891	0.00083914	226.673	7.54524	0.987565
16	3420	40.1	0.0117251	27.7085	0.740639	0.05196	0.001195	0.355988	0.0185	0.00242835	233.504	8.58615	0.978647
17	3490	39.8	0.011404	28.6862	0.818849	0.05146	0.0011765	0.365355	0.0125	0.00171828	224.415	8.01822	0.984818
18	3610	61	0.0168975	28.177	0.837303	0.05151	0.00117738	0.307724	0.01146	0.000870708	228.246	8.25912	0.984828
19	2390	37.8	0.0158159	27.248	2.72781	0.05153	0.00140165	0.456296	0.025	0.00592115	235.273	21.9422	0.980023
20	4120	81	0.0196602	27.027	1.02982	0.0521	0.00123344	0.374301	0.01311	0.000956634	239.323	10.5915	0.977953
21	4110	57.7	0.0140389	28.2247	0.755337	0.05138	0.00120015	0.28979	0.0166	0.00192879	227.385	7.70454	0.987403
22	2850	62.4	0.0218947	28.7935	0.817576	0.05257	0.00120563	0.403379	0.0127	0.000848891	227.985	10.2912	0.96478
23	3440	41.3	0.0120058	28.6041	0.887952	0.05091	0.00112144	0.390818	0.0117	0.00141942	222.833	7.70789	0.994458
24	5170	91	0.0176015	27.2257	0.849693	0.05264	0.00143833	0.555719	0.0259	0.00562391	239.961	11.056	0.968998
25	3740	51	0.0136364	28.0112	0.835507	0.05161	0.00111438	0.233069	0.01073	0.000886371	229.853	8.28002	0.983572
26	3280	67.9	0.0207012	27.9877	0.778105	0.051	0.00117337	0.390015	0.01078	0.00064698	227.59	7.44701	0.994553
27	3800	69	0.0181579	28.7026	0.785044	0.05312	0.00137953	0.411129	0.0173	0.00232588	230.771	11.8708	0.956575
28	3530	85	0.0240793	27.9564	0.948299	0.05257	0.00132115	0.394929	0.0143	0.00113657	234.081	11.0938	0.968114
29	3220	39.1	0.0121429	28.3206	0.808892	0.0519	0.00114784	0.294823	0.0124	0.00112761	228.749	8.67841	0.977835
30	3840	56.5	0.0147135	28.0112	0.951374	0.05155	0.00119794	0.375105	0.0156	0.00172839	229.614	9.01818	0.984959
31	4120	46.4	0.0112621	28.2486	0.951865	0.05088	0.001152	0.393775	0.0127	0.00112894	225.229	8.24703	0.995477
32	1960	64.9	0.0331122	26.8529	0.853531	0.05306	0.00120936	0.361446	0.0276	0.00207478	244.646	11.6219	0.963267
33	3870	38.7	0.01	28.6451	0.794012	0.05091	0.00112997	0.38055	0.0115	0.000996895	222.547	7.19924	0.994516
34	3920	115.9	0.0295663	26.0146	0.755776	0.0515	0.00110136	0.329251	0.01203	0.000501486	245.054	8.03228	0.992435
35	4080	164	0.0401961	25.1889	1.30654	0.05308	0.00129981	0.136373	0.0221	0.00165993	258.993	14.8735	0.96479
Spot No.	Element (ppm)			Isotopic ratio							206Pb/238U Age	±2σ	Concordance
	Th	U	Th/U	238U/206Pb	±2σ	207Pb/206Pb	±2σ	rho	208Pb/232Th	±2σ
Phengite gneiss YK192-1b: Zircon core
1	219	33	0.150685	22.5734	2.33703	0.0546	0.00245611	0.186587	0.13	0.240014	292.236	30.6673	0.952469
2	104	91.8	0.882692	8.14996	0.536794	0.0649	0.00246877	0.33735	0.0407	0.00310847	752.369	40.5831	0.992268
3	291	168.7	0.579725	8.80282	0.323346	0.0653	0.00170752	0.410947	0.0365	0.00149094	715.322	26.5472	0.970211
4	288.4	474	1.64355	7.58725	0.187055	0.0662	0.00172133	0.547416	0.03872	0.00109913	801.981	19.9841	0.995779
5	72.1	39.7	0.550624	9.70874	0.457946	0.0642	0.00289977	0.317108	0.0415	0.0074464	657.985	35.5943	0.957942
6	224	91	0.40625	15.4559	2.07755	0.0549	0.00385948	0.590318	0.025	0.0200062	404.743	50.6374	0.962725
7	285	16	0.0561404	24.8756	2.88962	0.0551	0.00329005	0.462629	0.09	0.200008	270.615	34.1772	0.950938
8	86	64.2	0.746512	8.5034	0.367149	0.0649	0.00221919	0.217719	0.0412	0.00291873	730.037	29.7365	0.980671
9	206	322	1.56311	11.6414	0.528393	0.0616	0.00209948	0.139211	0.03605	0.00119262	556.309	29.7356	0.955532
10	127.3	72.8	0.571877	10.5485	0.340331	0.0623	0.00244183	0.357625	0.0349	0.00156435	604.877	26.9348	0.966443
11	171	76.9	0.449708	12.2549	0.6211	0.0592	0.0021545	0.164652	0.0326	0.00172775	518.314	26.8545	0.974521
12	162.6	134.5	0.827183	7.7101	0.222575	0.0646	0.00197971	0.293074	0.039	0.00169068	779.717	23.2049	1.0084
13	348	232.9	0.669253	7.62195	0.206585	0.06526	0.00163818	0.184397	0.03775	0.00124504	791.567	20.3852	1.00429
14	103.5	75.9	0.733333	8.07103	0.274063	0.0648	0.00213767	0.347288	0.0378	0.00195232	756.73	25.3495	0.99694
15	130	83	0.638462	10.7527	1.40401	0.0619	0.00306148	0.507001	0.024	0.0250046	593.288	64.1248	0.951533
16	1170	208	0.177778	21.8341	2.04932	0.0549	0.00185893	0.28321	0.01543	0.000587566	302.227	28.4776	0.947372
17	123.7	83.7	0.676637	11.5607	1.17241	0.0617	0.00243572	0.402444	0.0313	0.0024803	559.994	49.8855	0.946022
18	1161	172	0.148148	22.7273	0.943199	0.05471	0.00141678	0.195259	0.0277	0.00275625	291.023	16.8647	0.953581
19	341	151	0.442815	8.14996	0.317383	0.0662	0.00185553	0.473584	0.037	0.00213251	762.958	27.5106	0.978478
20	780	208	0.266667	10.1937	0.987645	0.0639	0.0016862	0.344523	0.0374	0.00289819	632.475	50.8442	0.949987
21	135	171	1.26667	8.92857	0.89491	0.0635	0.00245416	0.208745	0.0391	0.00329417	693.914	54.3178	0.979437
22	1076	133	0.123606	21.1864	1.93227	0.0547	0.00162383	0.592756	0.0171	0.00124778	309.212	27.4502	0.954539
Phengite gneiss YK192-1b: Zircon mantle
23	208	2.8	0.0134615	26.8817	2.16348	0.0522	0.0034612	0.455137	-0.009	-0.016001	240.886	22.877	0.973377
24	457	18.3	0.0400438	25.4453	0.823525	0.0493	0.00205236	0.492921	-0.012	-0.0370008	240.405	13.3876	1.03413
25	130.2	2.4	0.0184332	27.1003	1.03464	0.0529	0.00337037	0.220263	-0.0016	-0.00350015	242.008	17.6539	0.962485
26	1062	43.4	0.0408663	28.5633	0.768461	0.05164	0.00134398	0.292571	0.0165	0.00173173	225.987	8.45739	0.981861
27	259	2.4	0.00926641	27.3973	0.990947	0.0501	0.00197332	0.384436	0.024	0.0870013	228.308	11.2181	1.01272
28	585	45.2	0.077265	28.9184	0.909933	0.0521	0.00190939	0.48331	0.0117	0.00161702	225.281	11.2125	0.973508
29	428	86.8	0.202804	27.933	1.158	0.0523	0.00208185	0.441073	0.01133	0.000918394	233.182	13.2856	0.96958
30	368	4.1	0.0111413	26.8817	0.789463	0.051	0.00189747	0.200891	-0.005	-0.0160003	235.944	9.98894	0.998214
31	935	3.7	0.00395722	28.7109	0.779774	0.0508	0.00149742	0.24111	0.012	0.0190015	221.658	8.0276	0.996297
32	103.2	5.3	0.0513566	26.0417	0.909814	0.0503	0.00383432	0.22775	-0.0012	-0.0028001	239.746	18.1264	1.01768
33	650	25.8	0.0396923	28.2486	1.25191	0.0519	0.00174283	0.460426	0.0211	0.00741202	229.271	12.2664	0.975792
34	2190	14	0.00639269	29.3255	1.11305	0.05172	0.00126031	0.411451	0.015	0.0120037	221.015	9.97566	0.978647
35	1210	49.3	0.0407438	28.5714	1.06436	0.0521	0.00137687	0.398173	0.00971	0.000813519	227.732	10.7498	0.974231
36	1074	16.5	0.0153631	27.7778	1.28384	0.0513	0.00143272	0.437163	0.028	0.0460034	230.336	11.3253	0.985106
37	174	0.2	0.00114943	26.738	1.13479	0.0523	0.00317712	0.497319	-0.019	-0.0310023	242.451	16.779	0.978515
38	510	0.5	0.000980392	27.027	0.823219	0.0522	0.00182755	0.431867	-0.011	-0.0210012	239.732	11.0599	0.977299
39	211	6.8	0.0322275	25.6542	0.793642	0.0518	0.0022524	0.36773	0.024	0.0450026	249.389	12.0713	0.989712
40	138	1.8	0.0130435	25.9269	0.791706	0.0518	0.0030795	0.436204	0.009	0.0220007	247.061	14.9105	0.988972
41	1269	37.2	0.0293144	28.8934	0.792709	0.05096	0.00132075	0.416681	0.0132	0.00152305	221.023	7.64975	0.993038
42*	89.7	-2.8	-0.0312152	28.7356	1.36544	0.0572	0.00321072	0.296865	-0.0037	-0.00520053	246.252	27.8459	0.896836
43*	42.5	0.7	0.0164706	28.3286	1.55166	0.0544	0.00936343	0.199324	-0.0027	-0.00510029	238.507	40.612	0.943279
Phengite gneiss YK192-1b: Zircon rim
44	1140	48.4	0.0424561	28.49	0.965323	0.05169	0.00130719	0.407215	0.01016	0.000796361	226.705	9.42674	0.980113
45	435	4.2	0.00965517	27.7547	0.858403	0.0509	0.0018964	0.56421	0.001	0.014	228.898	9.94423	0.996366
46	910	26.4	0.029011	27.7778	1.42453	0.05094	0.00137272	0.468734	0.0114	0.00420618	228.888	11.899	0.997316
47	233	-5.3	-0.0227468	28.2646	0.914609	0.0522	0.00261724	0.542513	0.022	0.0510019	230.34	13.4984	0.971828
48	289	-0.1	-0.000346021	29.7796	0.960702	0.0524	0.00225794	0.409453	-0.025	-0.0330038	220.558	12.7114	0.967547
Note: spot numbers with asterisk reprensent the analyses that were not included in the final calculation of weighted mean ages.
